# Supplementary material
Source: Springer Nature journal article supplement (https://www.springermedizin.de/resource/supplementary/13048_2012_115_MOESM2_ESM.pdf/9664930)

# Oct4A

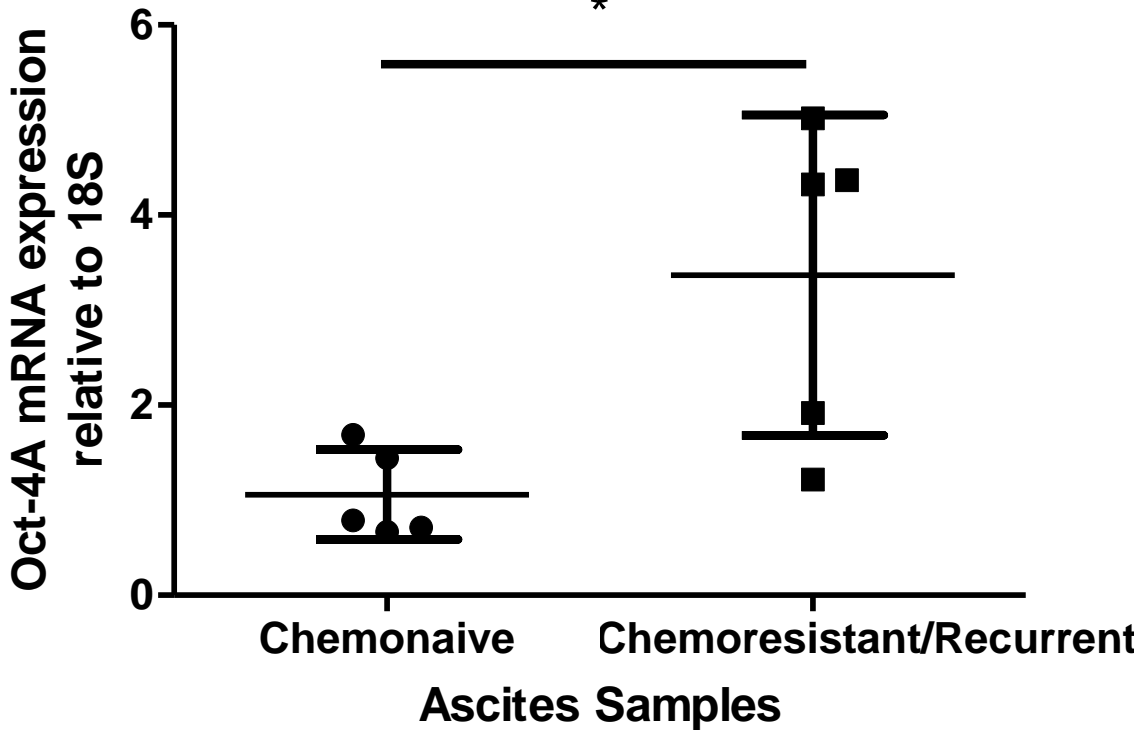

n=5

Supplement: MOESM2 [file 9664930]
